# Supplementary material
Source: PubMed Central journal article supplement (PMC3307313)
Supplement: supp_M111.298703_jbc.M111.298703-3.pdf [file supp_M111.298703_jbc.M111.298703-3.pdf]

## SUPPLEMENTAL FIGURE LEGENDS

**FIGURE S1:** Fluoroprotein-tagged IL-33 exhibits static nuclear localization. **A.** Sub-cellular localization of fluoroprotein-tagged IL-33 in resting cells. IL-33 was tagged either at its amino or carboxy terminus with mCherry (mCherry-IL-33) or GFP (IL-33-GFP) respectively. A fibroblast cell line stably expressing either fusion protein displayed solely nuclear fluorescence. **B.** Fluoroprotein-tagged IL-33 nuclear localization is unchanged by cellular deformation. mCherry-IL-33 expressing fibroblasts were subjected to 1Hz cyclic 8% biaxial stretch for four hours. This stimulus failed to alter the nuclear localization of the fusion protein. Scale bars represent 10 $\mu$ m.

**VIDEO V1:** Timelapse microscopy of dynamic IL-33 nucleo-cytoplasmic flux. A fibroblast cell line stably expressing tetracysteine-tagged IL-33 were pulsed with a tetracysteine-avid fluorescent dye and imaged in time-lapse fashion by epifluorescent microscopy. Images were acquired every ten minutes after pulse and assembled into a movie. Over the ninety minutes depicted in the movie, and initial dominant nuclear fluorescence can be seen evolving into a spiculated cytoplasmic pattern.
