# Supplementary material
Source: PubMed Central journal article supplement (PMC3307313)

# Supplemental Figure S1

**A**

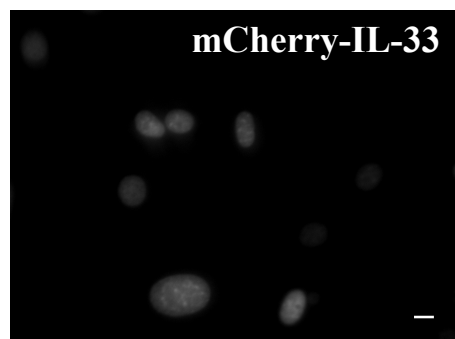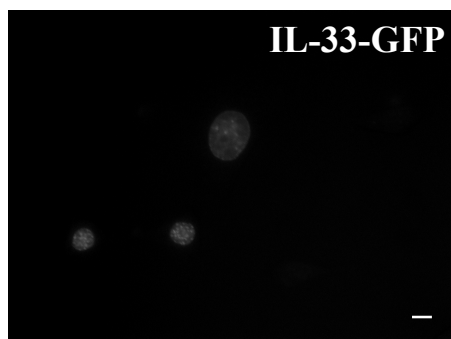

**B**

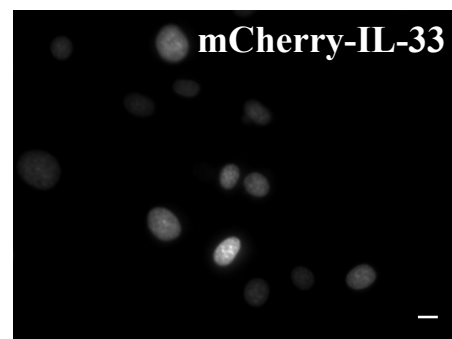

Supplement: supp_M111.298703_jbc.M111.298703-1.pdf [file supp_M111.298703_jbc.M111.298703-1.pdf]
